# Supplementary material
Source: PubMed Central journal article supplement (PMC6145665)
Supplement: jamacardiol-e181049-s001.pdf [file jamacardiol-e181049-s001.pdf]

## Supplementary Online Content

Chatterjee NA, Moorthy MV, Pester J, et al; PRE-DETERMINE Study Group. Sudden death in patients with coronary heart disease without severe systolic dysfunction. *JAMA Cardiol*. Published online May 2, 2018. doi:10.1001/jamacardio.2018.1049

**eMethods.** Supplementary Methods

**eTable 1.** Circumstances and Clinical History Prior to Sudden and/or Arrhythmic Death

**eTable 2.** Cause-specific Hazard for the Association of Clinical Risk Factors with Sudden and/or Arrhythmic versus Competing Modes of Death

**eTable 3.** Sudden and/or Arrhythmic Proportion of Total Mortality in Clinical Subgroups

**eTable 4.** Differential Association of Clinical Risk Factors with SAD and Non-SAD: Sensitivity Analysis Excluding 36 Participants with Unclassified Mode of Death

**eTable 5.** Differential Association of Clinical Risk Factors with SAD versus non-SAD: Sensitivity Analysis Excluding 30 Participants with Probable Sudden Cardiac Death

**eTable 6.** Differential Association of Clinical Risk Factors with SAD versus Non-SAD: Sensitivity Analysis Excluding 13 Participants with Out of Hospital Cardiac Arrest

**eFigure 1.** Geographic Distribution of Enrollment Sites in PRE-DETERMINE

**eFigure 2.** Continuous Association between LV Ejection Fraction and Age with Cause-Specific Death

This supplementary material has been provided by the authors to give readers additional information about their work.

**eMethods.** Supplementary Methods

### ***Baseline LVEF, NYHA Functional Class, and Covariate Ascertainment***

Baseline data on demographics, clinical characteristics, past medical history, lifestyle habits, cardiac test results, and medications were collected. The baseline LVEF was chosen to be the most recent assessment on which current medical treatment was based at the time of entry into the study. Modalities utilized to assess LVEF included echocardiograms (N=3092 [54%]), invasive catheterization (N= 1166 [20%]), nuclear imaging (N= 1122 [19%], or cardiac magnetic resonance imaging (N= 380 [7%]). NYHA functional class was assessed using consensus guideline criteria.<sup>6</sup>

### ***Ascertainment and Classification of Incident Cardiovascular Events and Death***

Questionnaires inquiring about intervening cardiac arrest, ICD implantation, and other pertinent cardiovascular endpoints were mailed to participants every six months. If the questionnaire was not returned, telephone contact with the participant was initiated to complete the interval health assessment and assess vital status, followed by telephone calls to patient contacts, next-of-kin, and clinical site study staff. Vital status was further assessed using contact with postal authorities, obituary searches, and serial searches of the National Death Index for names of non-respondents.

### ***Ascertainment and Classification of Incident Cardiovascular Events and Death***

Cardiac deaths included those that were classified as SAD or were documented to be due to myocardial infarction, pump failure with progressive symptomatic deterioration, stroke, cardiovascular procedural deaths, or other vascular causes. Deaths known to have occurred after a chronic terminal illness (e.g. malignancy not in remission) and/or occurring in hospice without information regarding the circumstances surrounding the fatal event were classified as

non-SAD deaths even if no specific information was available regarding the terminal event. Finally, the presence of an ICD was not considered in the application of death adjudication criteria.

### ***Competing Risk Analysis***

For competing-risk analyses with the primary SAD endpoint as the outcome, non-SAD deaths (non-sudden, non-arrhythmic cardiovascular, non-cardiovascular, unclassified) were treated as competing risk. Similarly, when non-SAD deaths were considered as the outcome, participants experiencing the primary endpoint (including those experiencing out of hospital VF arrest) were treated as competing risk.

**eTable 1.** Circumstances and Clinical History Prior to Sudden and/or Arrhythmic Death

|                                                              | <b>Sudden Arrhythmic Death (N=125)</b> |
|--------------------------------------------------------------|----------------------------------------|
| Location of death or cardiac arrest, n (%)                   |                                        |
| Home                                                         | 89 (71)                                |
| Public                                                       | 25 (20)                                |
| In-Hospital                                                  | 8 (7)                                  |
| Unknown                                                      | 3 (2)                                  |
| Witnessed, n (%)                                             |                                        |
| Yes                                                          | 66 (53)                                |
| No                                                           | 55 (44)                                |
| Unknown                                                      | 4 (3)                                  |
| Rhythm Monitor at Time of Death, n (%)                       |                                        |
| Yes                                                          | 57 (46)                                |
| No                                                           | 68 (54)                                |
| Initial Rhythm in Monitored Deaths, n (% of monitored)       |                                        |
| Ventricular fibrillation or tachycardia                      | 34 (60)                                |
| Asystole                                                     | 16 (28)                                |
| Pulseless electrical activity                                | 6 (10)                                 |
| Bradycardia                                                  | 1 (2)                                  |
| Clinical History (% of those with history ascertainment)     |                                        |
| Unstable angina within 1 month                               | 18 of 94 (19)                          |
| History of worsening heart failure within 3 months           | 5 of 87 (6)                            |
| Newly documented LVEF < 35% prior to death                   | 21 of 93 (23)                          |
| ICD implantation prior to SAD death                          | 6 of 125 (5)                           |
| Most vigorous activity in the one hour prior to death, n (%) |                                        |
| Sleeping                                                     | 30 (24)                                |
| At rest                                                      | 52 (42)                                |
| Light exertion                                               | 18 (14)                                |
| Moderate exertion                                            | 7 (6)                                  |
| Vigorous exertion                                            | 4 (3)                                  |
| Unknown                                                      | 14 (11)                                |
| Symptoms reported prior to death, n (%)                      |                                        |
| Yes                                                          | 45 (36)                                |
| No                                                           | 72 (58)                                |
| Unknown                                                      | 8 (6)                                  |
| Cardiac symptoms, n (% of those with symptom ascertainment)  |                                        |
| Chest pain                                                   | 14 (12)                                |
| Dyspnea                                                      | 18 (15)                                |
| Syncope/Presyncope                                           | 8 (7)                                  |
| Diaphoresis/Nausea/Indigestion                               | 6 (5)                                  |

SAD, sudden and/or arrhythmic death

**eTable 2.** Cause-specific Hazard for the Association of Clinical Risk Factors with Sudden and/or Arrhythmic versus Competing Modes of Death

| Clinical Subgroup                  | Hazard Ratio SAD  | Hazard Ratio Non-SAD |
|------------------------------------|-------------------|----------------------|
| Age                                |                   |                      |
| ≤ 59                               | Reference         | Reference            |
| 60-69                              | 0.77 (0.47-1.24)  | 2.60 (1.80-3.75)     |
| >69                                | 1.45 (0.95-2.21)  | 7.55 (5.40-10.55)    |
| Male Sex                           | 1.10 (0.71-1.70)  | 0.86 (0.70-1.07)     |
| White Race                         | 1.04 (0.59-1.85)  | 0.76 (0.54-1.08)     |
| History of Smoking                 | 1.48 (0.98-2.23)  | 1.36 (1.10-1.69)     |
| Hypertension                       | 1.73 (1.06-2.83)  | 1.70 (1.31-2.19)     |
| History of Revascularization       | 1.03 (0.52-2.03)  | 0.73 (0.53-0.99)     |
| Family History Sudden Death        | 1.23 (0.86-1.89)  | 1.05 (0.84-1.30)     |
| Diabetes Mellitus                  | 2.16 (1.51-3.09)  | 1.99 (1.65-2.41)     |
| Atrial Fibrillation                | 2.23 (1.47-3.37)  | 2.52 (2.04-3.12)     |
| Left Ventricular Ejection Fraction |                   |                      |
| ≥ 60%                              | Reference         | Reference            |
| 50-59%                             | 1.81 (0.96-3.39)  | 1.32 (0.99-1.75)     |
| 40-49%                             | 3.78 (2.10-6.78)  | 2.01 (1.54-2.64)     |
| 30-39%                             | 5.46 (2.71-10.99) | 3.07 (2.18-4.32)     |
| NYHA Class                         |                   |                      |
| I                                  | Reference         | Reference            |
| II                                 | 1.02 (0.61-1.69)  | 2.09 (1.68-2.60)     |
| III/IV                             | 2.84 (1.52-5.31)  | 3.41 (2.45-4.75)     |

SAD, sudden and/or arrhythmic death. NYHA, New York Heart Association.

**eTable 3.** Sudden and/or Arrhythmic Proportion of Total Mortality in Clinical Subgroups

| Clinical Subgroup                  | Subgroup N | No. SAD /<br>No. Non-SAD | % Total<br>Deaths, SAD | P, for<br>difference %<br>SAD |
|------------------------------------|------------|--------------------------|------------------------|-------------------------------|
| Age                                |            |                          |                        |                               |
| ≤ 59                               | 1882       | 37/39                    | 49%                    | <0.001                        |
| 60-69                              | 1990       | 30/106                   | 22%                    |                               |
| >69                                | 1889       | 52/281                   | 16%                    |                               |
| Sex                                |            |                          |                        |                               |
| Male                               | 4391       | 93/314                   | 23%                    | 0.32                          |
| Female                             | 1370       | 26/112                   | 19%                    |                               |
| Race/Ethnicity                     |            |                          |                        |                               |
| White                              | 5128       | 106/391                  | 21%                    | 0.36                          |
| Other                              | 633        | 13/35                    | 27%                    |                               |
| Smoking                            |            |                          |                        |                               |
| Never                              | 1945       | 31/118                   | 21%                    | 0.72                          |
| Ever                               | 3814       | 88/308                   | 22%                    |                               |
| Hypertension                       |            |                          |                        |                               |
| Yes                                | 4371       | 100/356                  | 22%                    | 0.90                          |
| No                                 | 1390       | 19/70                    | 21%                    |                               |
| History of Revascularization       |            |                          |                        |                               |
| Yes                                | 5328       | 110/381                  | 22%                    | 0.33                          |
| No                                 | 433        | 9/45                     | 17%                    |                               |
| Family History Sudden Death        |            |                          |                        |                               |
| Yes                                | 1432       | 35/108                   | 24%                    | 0.37                          |
| No                                 | 4329       | 84/318                   | 21%                    |                               |
| Diabetes Mellitus                  |            |                          |                        |                               |
| Yes                                | 1860       | 58/198                   | 23%                    | 0.66                          |
| No                                 | 3901       | 61/228                   | 21%                    |                               |
| Atrial Fibrillation                |            |                          |                        |                               |
| Yes                                | 791        | 30/118                   | 20%                    | 0.59                          |
| No                                 | 4969       | 89/308                   | 22%                    |                               |
| Left Ventricular Ejection Fraction |            |                          |                        |                               |
| ≥ 60%                              | 1591       | 14/77                    | 15%                    | 0.25                          |
| 50-59%                             | 1997       | 31/124                   | 20%                    |                               |
| 40-49%                             | 1756       | 56/167                   | 25%                    |                               |
| 40-49%                             | 417        | 18/58                    | 24%                    |                               |
| 30-39%                             |            |                          |                        |                               |
| NYHA Class                         |            |                          |                        |                               |
| I                                  | 4597       | 90/273                   | 25%                    | 0.03                          |
| II                                 | 925        | 18/113                   | 14%                    |                               |
| III/IV                             | 223        | 11/40                    | 22%                    |                               |

SAD, sudden and/or arrhythmic death.

**eTable 4.** Differential Association of Clinical Risk Factors with SAD and Non-SAD: Sensitivity Analysis Excluding 36 Participants with Unclassified Mode of Death

| Clinical Subgroup                  | Subdistribution Hazard Ratio SAD | Subdistribution Hazard Ratio Non-SAD | P, for $\Delta$ association |
|------------------------------------|----------------------------------|--------------------------------------|-----------------------------|
| Age                                |                                  |                                      |                             |
| ≤ 59                               | Reference                        | Reference                            | <0.001                      |
| 60-69                              | 0.76 (0.47-1.22)                 | 2.62 (1.78-3.86)                     |                             |
| >69                                | 1.37 (0.90-2.08)                 | 7.81 (5.49-11.10)                    |                             |
| Male Sex                           | 1.10 (0.71-1.70)                 | 0.90 (0.72-1.13)                     | 0.42                        |
| Non-White Race                     | 1.05 (0.59-1.86)                 | 0.71 (0.49-1.02)                     | 0.28                        |
| History of Smoking                 | 1.47 (0.98-2.22)                 | 1.34 (1.07-1.67)                     | 0.67                        |
| Hypertension                       | 1.70 (1.04-2.78)                 | 1.70 (1.30-2.22)                     | 0.96                        |
| History of Revascularization       | 1.04 (0.53-2.06)                 | 0.71 (0.51-0.98)                     | 0.32                        |
| Family History Sudden Death        | 1.27 (0.86-1.89)                 | 1.05 (0.84-1.31)                     | 0.41                        |
| Diabetes Mellitus                  | 2.10 (1.47-3.01)                 | 1.94 (1.59-2.37)                     | 0.65                        |
| Atrial Fibrillation                | 2.12 (1.40-3.20)                 | 2.55 (2.04-3.18)                     | 0.55                        |
| Left Ventricular Ejection Fraction |                                  |                                      |                             |
| ≥ 60%                              | Reference                        | Reference                            | -                           |
| 50-59%                             | 1.80 (0.96-3.38)                 | 1.22 (0.91-1.64)                     | 0.27                        |
| 40-49%                             | 3.70 (2.06-6.64)                 | 1.93 (1.46-2.54)                     | 0.04                        |
| 30-39%                             | 5.27 (2.62-10.61)                | 2.86 (2.00-4.09)                     | 0.11                        |
| NYHA Class                         |                                  |                                      |                             |
| I                                  | Reference                        | Reference                            | -                           |
| II                                 | 1.00 (0.60-1.65)                 | 2.03 (1.61-2.55)                     | 0.01                        |
| III/IV                             | 2.65 (1.41-4.96)                 | 3.36 (2.37-4.74)                     | 0.62                        |

SAD, sudden and/or arrhythmic death

**eTable 5.** Differential Association of Clinical Risk Factors with SAD versus non-SAD: Sensitivity Analysis Excluding 30 Participants with Probable Sudden Cardiac Death

| Clinical Subgroup                  | Subdistribution Hazard Ratio SAD | Subdistribution Hazard Ratio Non-SAD | P, for $\Delta$ association |
|------------------------------------|----------------------------------|--------------------------------------|-----------------------------|
| Age                                |                                  |                                      |                             |
| ≤ 59                               | Reference                        | Reference                            | <0.001                      |
| 60-69                              | 0.73 (0.42-1.28)                 | 2.27 (1.62-3.18)                     |                             |
| >69                                | 1.34 (0.83-2.17)                 | 6.38 (4.70-8.66)                     |                             |
| Male Sex                           | 1.14 (0.69-1.89)                 | 0.87 (0.71-1.08)                     | 0.34                        |
| Non-White Race                     | 1.21 (0.64-2.27)                 | 0.75 (0.54-1.05)                     | 0.21                        |
| History of Smoking                 | 1.57 (0.97-2.54)                 | 1.35 (1.10-1.66)                     | 0.54                        |
| Hypertension                       | 1.89 (1.05-3.40)                 | 1.66 (1.30-2.12)                     | 0.65                        |
| History of Revascularization       | 0.87 (0.42-1.80)                 | 0.76 (0.56-1.04)                     | 0.77                        |
| Family History Sudden Death        | 1.19 (0.75-1.90)                 | 1.07 (0.87-1.32)                     | 0.67                        |
| Diabetes Mellitus                  | 2.15 (1.42-3.25)                 | 1.97 (1.64-2.36)                     | 0.62                        |
| Atrial Fibrillation                | 2.04 (1.26-3.31)                 | 2.49 (2.03-3.06)                     | 0.57                        |
| Left Ventricular Ejection Fraction |                                  |                                      |                             |
| ≥ 60%                              | Reference                        | Reference                            | -                           |
| 50-59%                             | 2.32 (1.04-5.19)                 | 1.29 (0.98-1.70)                     | 0.16                        |
| 40-49%                             | 5.15 (2.43-10.91)                | 1.97 (1.52-2.55)                     | 0.01                        |
| 30-39%                             | 6.46 (2.68-15.59)                | 3.05 (2.19-4.24)                     | 0.14                        |
| NYHA Class                         |                                  |                                      |                             |
| I                                  | Reference                        | Reference                            | -                           |
| II                                 | 1.14 (0.65-2.00)                 | 1.97 (1.59-2.43)                     | 0.08                        |
| III/IV                             | 2.96 (1.47-5.95)                 | 3.21 (2.33-4.43)                     | 0.96                        |

SAD, sudden and/or arrhythmic death.



**eTable 6.** Differential Association of Clinical Risk Factors with SAD versus Non-SAD: Sensitivity Analysis Excluding 13 Participants with Out of Hospital Cardiac Arrest

| Clinical Subgroup                  | Subdistribution Hazard Ratio SAD | Subdistribution Hazard Ratio Non-SAD | P, for $\Delta$ association |
|------------------------------------|----------------------------------|--------------------------------------|-----------------------------|
| Age                                |                                  |                                      |                             |
| ≤ 59                               | Reference                        | Reference                            |                             |
| 60-69                              | 0.74 (0.45-1.22)                 | 2.60 (1.80-3.75)                     | <0.001                      |
| >69                                | 1.27 (0.82-1.99)                 | 7.51 (5.38-10.50)                    |                             |
| Male Sex                           | 1.06 (0.67-1.67)                 | 0.87 (0.70-1.07)                     |                             |
| Non-White Race                     | 1.19 (0.67-2.12)                 | 0.76 (0.54-1.08)                     | 0.21                        |
| History of Smoking                 | 1.31 (0.86-1.99)                 | 1.36 (1.10-1.68)                     | 0.90                        |
| Hypertension                       | 1.82 (1.07-3.09)                 | 1.69 (1.31-2.18)                     | 0.77                        |
| History of Revascularization       | 0.92 (0.46-1.82)                 | 0.73 (0.53-0.99)                     | 0.56                        |
| Family History Sudden Death        | 1.21 (0.79-1.84)                 | 1.04 (0.84-1.30)                     | 0.56                        |
| Diabetes Mellitus                  | 2.28 (1.56-3.33)                 | 1.96 (1.62-2.37)                     | 0.44                        |
| Atrial Fibrillation                | 2.25 (1.46-3.46)                 | 2.49 (2.01-3.08)                     | 0.80                        |
| Left Ventricular Ejection Fraction |                                  |                                      |                             |
| ≥ 60%                              | Reference                        | Reference                            | -                           |
| 50-59%                             | 1.80 (0.94-3.46)                 | 1.31 (0.99-1.74)                     | 0.37                        |
| 40-49%                             | 3.47 (1.88-6.39)                 | 1.98 (1.51-2.60)                     | 0.08                        |
| 30-39%                             | 4.68 (2.23-9.81)                 | 3.01 (2.13-4.24)                     | 0.26                        |
| NYHA Class                         |                                  |                                      |                             |
| I                                  | Reference                        | Reference                            | -                           |
| II                                 | 1.06 (0.63-1.79)                 | 2.09 (1.68-2.61)                     | 0.02                        |
| III/IV                             | 2.70 (1.40-5.24)                 | 3.33 (2.39-4.63)                     | 0.69                        |

SAD, sudden and/or arrhythmic death

**eFigure 1.** Geographic Distribution of Enrollment Sites in PRE-DETERMINE.

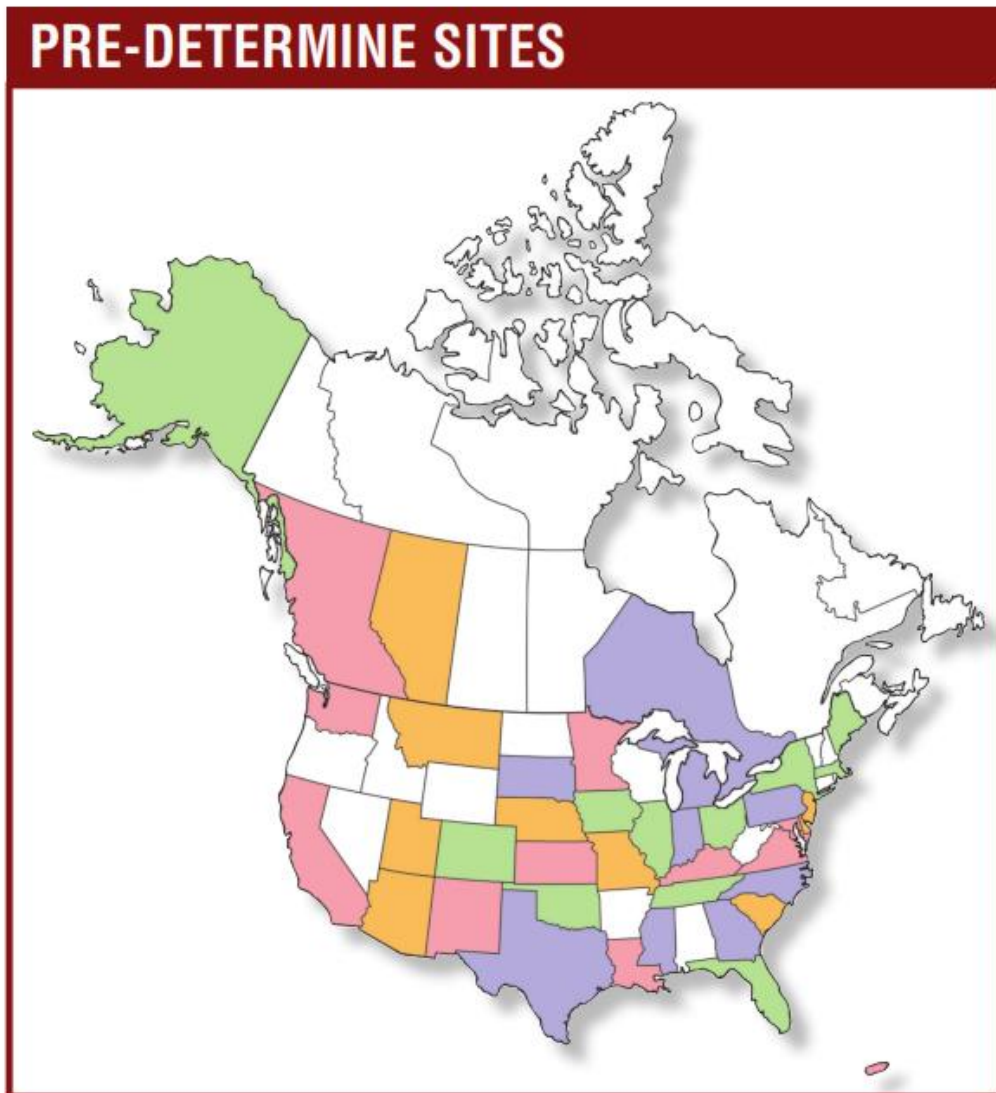

### Enrollment Percentages by State

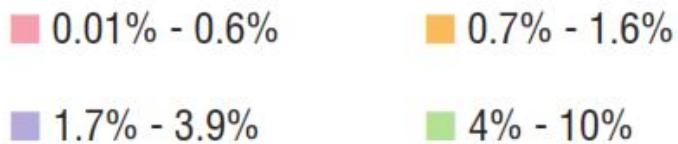

Shown is the geographic distribution of enrollment sites in the PRE-DETERMINE study in the United States and Canada.

**eFigure 2.** Continuous Association between LV Ejection Fraction and Age with Cause-Specific Death

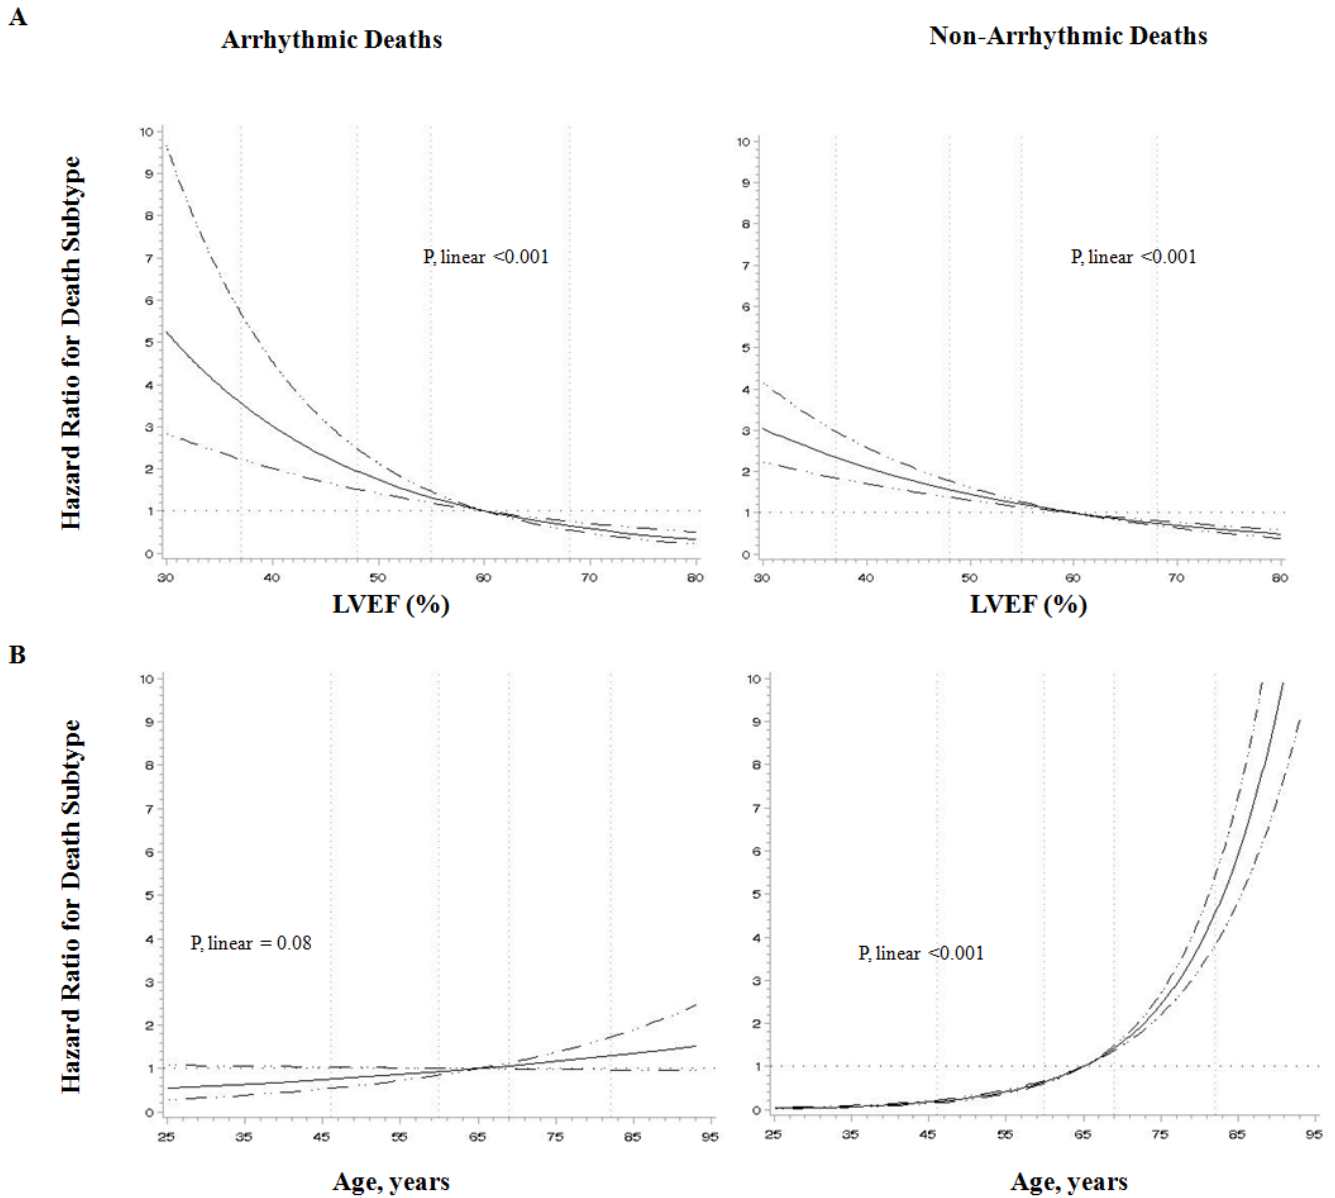

Cubic restricted spline models were used to examine the continuous association between left ventricular ejection fraction (Panel A) and age (Panel B) with cause-specific modes of death (SAD, non-SAD). There was no statistical evidence of non-linearity; continuous, linear associations are shown. SAD, sudden and/or arrhythmic death.
